# Supplementary material for: Transcription Factors Pmr1 and Pmr2 Cooperatively Regulate Melanin Biosynthesis, Conidia Development and Secondary Metabolism in Pestalotiopsis microspora
Source: MDPI journal article supplement (doi:10.3390/jof8010038), 2021-12-31
Supplement: s1 [file s1]

## Supplementary Materials

# Transcription factors Pmr1 and Pmr2 cooperatively regulate melanin biosynthesis, conidia development and secondary metabolism in *Pestalotiopsis microspora*

Mengkai Zhou <sup>1</sup>, Ze Li <sup>1</sup>, Yanjie Liu <sup>1</sup>, Ping Zhang <sup>1</sup>, Xiaoran Hao <sup>2</sup> and Xudong Zhu <sup>1,\*</sup>

<sup>1</sup> Beijing Key Laboratory of Genetic Engineering Drug and Biotechnology, College of Life Sciences, Beijing Normal University, Beijing 100875, China

<sup>2</sup> National Experimental Teaching Demonstrating Center, College of Life Sciences, Beijing Normal University, Beijing 100875, China

### \* Correspondence:

zhu11187@bnu.edu.cn (X.D. Zhu)

Tel: +86-010-58804266

---

---

## ASSOCIATED CONTENT

### Supplementary Tables and Figures

**Table S1.** Primers used for gene knockout and validation.

**Table S2.** Primers used in quantitative real-time PCR.

**Figure S1.** The predicted functional domains of Pmr1 and Pmr2.

**Figure S2.** Amino-acid sequence (complete sequence) alignments of Pmr1.

**Figure S3.** Diagnostic PCR screening for *pmr1* deletion mutants.

**Figure S4.** Diagnostic PCR screening for *pmr2* deletion mutants.

**Table S1.** Primers used for gene knockout and validation

| Primer name | Sequence (5'-3')                                           |
|-------------|------------------------------------------------------------|
| Pmr1-UF     | <u>GGGGACAGCTTTCTTGTACAAAGTGGA</u> ACCGTGTAAATCGTTGTGCT    |
| Pmr1-UR     | <u>GGGGACTGCTTTTTTGTACAAACTTGT</u> TCTCGGCTTGTTCTCAT       |
| Pmr1-DF     | <u>GGGGACAACCTTTGTATAGAAAAGTTGTT</u> TGCCAGATGCTGAAACATGCT |
| Pmr1-DR     | <u>GGGGACAACCTTTGTATAATAAAGTTGT</u> GCGTGACAGGAAAGAAAAGACC |
| Pmr1-KO-V-F | GAAACGCTGCCAACAACA                                         |
| Pmr1-KO-V-R | TCCAAGCCCTGGGGACTAT                                        |
| Pmr2-UF     | <u>GGGGACAGCTTTCTTGTACAAAGTGGA</u> CAACAGCAGCGGTCATCT      |
| Pmr2-UR     | <u>GGGGACTGCTTTTTTGTACAAACTTGT</u> CATCTCACCAGCCTCCAT      |
| Pmr2-DF     | <u>GGGGACAACCTTTGTATAGAAAAGTTGT</u> TGTCACCCTCTTGTCTTCCTC  |
| Pmr2-DR     | <u>GGGGACAACCTTTGTATAATAAAGTTGT</u> ATCAACTGCCGCATCTCG     |
| Pmr2-KO-V-F | TCCACCAAGACTTGACATCG                                       |
| Pmr2-KO-V-R | AGACCAGAAGGATAGAGGAGAC                                     |

\* The underlined parts indicate the homologous arms of the primers for BP reaction.

**Table S2.** Primers used in quantitative real-time PCR

| Primer name | Sequence (5'-3')       |
|-------------|------------------------|
| qPmr1-F     | GCATAAGCAGCGGGAGTC     |
| qPmr1-R     | TGGTTGGTCGGGAATGAA     |
| q11945-F    | GCAGCCAACAACAGCAAA     |
| q11945-R    | GGCAAGTTCAGCCACGAC     |
| qPmr2-F     | CCAACAGCAGCGGTCAT      |
| qPmr2-R     | GAGCGGTGGGCGAATAT      |
| qPks1-F     | GCCATAGGGAATAACGAGAA   |
| qPks1-R     | AGAGACAGAGACCAAAGCCC   |
| q11948-F    | AGAAGACGCCGACCTTGTAT   |
| q11948-R    | CGACCACCTGGAAGTGTAT    |
| qGAPDH-F    | CGCATTGGTCGTATCGT      |
| qGAPDH-R    | ACCGTGGGTGGAGTCGT      |
| q11355-F    | CGATGACAAGGCATTAAGC    |
| q11355-R    | GAGCATAGTCGGCGTAGA     |
| q11356-F    | TGTGCAACTGGGAACACT     |
| q11356-R    | TTGGATGAGACACTGCCTAC   |
| q11357-F    | TTCACAGGAGACAACATACT   |
| q11357-R    | CTAACCTTACTCGCCAGTT    |
| q11358-F    | ACCACCTCGTTCACAATC     |
| q11358-R    | CGCTGAAGAAGTCATCGT     |
| q11359-F    | GTCGCAGCACTATCTCAC     |
| q11359-R    | GGAAGTGGACGAACTTGG     |
| q11360-F    | ATATTCCGTCTTGTCTAGTCTC |
| q11360-R    | CGAGTAATGTTGGCTGTGA    |
| q11361-F    | CGGTATCGAGACATTGACA    |
| q11361-R    | CTGCTTGGCGTAGTTGAT     |
| q11362-F    | GTCAACAAGTCTGCGTATG    |
| q11362-R    | GTGCGAATATGCTGGAGA     |
| q11363-F    | TCGCCGTCACGATTAGTT     |
| q11363-R    | TCTCCATTTGGCTGCTTT     |
| q11364-F    | CACCGTCCGTGTCAGTA      |
| q11364-R    | TCCGCAGTAACAGCATC      |
| q11365-F    | TTGGACTATGAGACGGGAGA   |
| q11365-R    | GTGGAGATGGATCGGGTG     |
| q11366-F    | GCCGATGTTGGATGTGAG     |
| q11366-R    | CGTGCTTGGGTCCCTGAT     |
| q11367-F    | GAGGATGACTGGCTTACC     |
| q11367-R    | ATTGACGACACCGACATT     |
| q11368-F    | TGGATTGGTGAATGGATGG    |
| q11368-R    | TTGAGACTGTTGTGGATGG    |
| q11369-F    | GGTGTATGGATAGGCTTCAA   |

---

|          |                       |
|----------|-----------------------|
| q11369-R | CAGCAATCAGCACTTCCT    |
| q11370-F | CTGCCAACCTCCACTATAC   |
| q11370-R | CCAGAGTCCTTGTCCAATT   |
| q11371-F | AACTATCGGCGGCTTCTT    |
| q11371-R | GTGGCAGAGATGGTGGTA    |
| q11372-F | GTCTACGATTGGGCTGAG    |
| q11372-R | CCGATGAAGTGCTGAGTC    |
| q11373-F | CGACTGTGGCAAGAAGAA    |
| q11373-R | TTACGGACGAGAGGTGAA    |
| q11374-F | GCCAGAAGTTGTTGTAATACC |
| q11374-R | TGTCTAACGGATTTCGCAATA |
| q11375-F | TTGGACTGTTCCGTATATGG  |
| q11375-R | CTGGATGTTGACCGATAGG   |

---

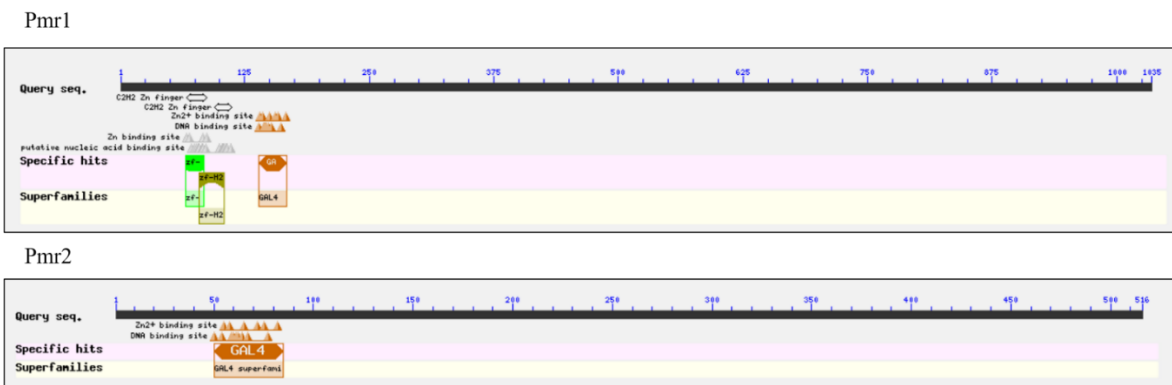

**Figure S1.** The predicted functional domains of Pmr1 and Pmr2. Pmr1 contained two Znf\_C2H2 zinc finger domains and a GAL4-like Zn<sub>2</sub>Cys<sub>6</sub> binuclear cluster DNA-binding domain. Pmr2 only contained a GAL4-like Zn<sub>2</sub>Cys<sub>6</sub> binuclear cluster domain.

Identity=57.27%

|                           |                                                                                                       |      |
|---------------------------|-------------------------------------------------------------------------------------------------------|------|
| PfmaH [P. fici W106-1]    | .....                                                                                                 | 0    |
| Cmrl [P. vexata]          | .....MVF                                                                                              | 3    |
| Cmrl [C. incanum]         | LQPSSSLSHFSIHKRNKSTSCHLVYCYRCPSSSTCYDVSLQFDDTTNTSNLLFISITTSLNKSRSLALHLDESIRIDNLFIRIRCDPCNQTATMVF      | 100  |
| Pmrl [P. microspora_NK17] | .....MFKRLITKYDVIFKQKSMETIPTKFMHGFSS....LTSQPLHLDPDPCTQCAASTETSLQYKMTNNMIY                            | 66   |
| Consensus                 | .....                                                                                                 |      |
| PfmaH [P. fici W106-1]    | .....MIMSNCSRDILQREFSYVHPSASEAFVAGAGFSVAGTETPCNCCAKTGGKKEVPCQCCQKQKGLHC                               | 70   |
| Cmrl [P. vexata]          | CAYCGKSFTRKEHIERHIPHTNVKPHRCACQLSFARRDILQRHSTYHEA.HPMEFEPGGVETIVAGTETPCNCCAKTGGKKEVPCQARCAIENEC       | 102  |
| Cmrl [C. incanum]         | CAYCGKSFTRKEHIERHIPHTNVKPHRCACQLSFARRDILQRHSTYHEARDPMEHFGGVETIVAGTETPCNCCAKTGGKKEVPCQARCAIENEC        | 200  |
| Pmrl [P. microspora_NK17] | CTYCGKAFTRKEHIERHIPHTNIKPHKCSHCRLAFAARRDILQRIAYHEEQAEHTPAGATNSATGKQQISCCNCCAKTGGKKEVPCQARCAIENEC      | 166  |
| Consensus                 | rdllqrh yh p g g i c nc aktgc k vpc rc k l c                                                          |      |
| PfmaH [P. fici W106-1]    | VCRPRTTSLHPCNCAQAATAAACAARVACVPTVTCQSIPIVSVSIEFSQTLISQICFLVHGGASVMDPAILENF..LMNSFMKQDPEVHIGSSP        | 168  |
| Cmrl [P. vexata]          | AARARSSSRPRLAAQASAAAMESOVSLPQITISDTITVNEAFMDMDPAIATRCQDSFGCPVMTDPG.IITIDPRIQHD....SPFKSSSPASSNHIS     | 196  |
| Cmrl [C. incanum]         | AARARSSSRPRLAAQASAAAFCCOMMP...TVFQPAQPVAFMDLDPSIP.KQDSFSP.MSTESP.IATMDPRMMEG.....PMKSSSTQS.HRSS       | 285  |
| Pmrl [P. microspora_NK17] | VCRPRTTSLHPCNCAQAACAQAACAGVGTACAPRVVQCCPIGNLSVPVSESSCLPLIQCPHQDDPGVVNLHQIMMDPEFMNMPYHNERQSGSEIHQASP   | 266  |
| Consensus                 | r arr sk a r q                                                                                        | s    |
| PfmaH [P. fici W106-1]    | ANSIIFPLFIHLKAPSPRCRTASVDLNFNNMNSPSPSIEPMEDQSWVNSLMSNDFNPGPNMFSSTYDLGYQLGFIYADPTTDFSQMSQSMQLCHDASM    | 268  |
| Cmrl [P. vexata]          | EN.....YHSHARVDGMD.....DFMQLGDFMFDGNVQD.MLVWQIVPLSMDMYPSMS.....L                                      | 248  |
| Cmrl [C. incanum]         | DE.....FSPHSHRVGDL.....EFMQLNDFITPTDINQD.MMVWPEPIELDMYSQQLP.....I                                     | 337  |
| Pmrl [P. microspora_NK17] | GNNLNFHVPMHLKTESPRQDSENLG.....DFSLLEIDTALGWP.SHFDDFGTAPP.DLEQSNYSLEQPSGTFSFN.....AATYPATQCDSSM        | 350  |
| Consensus                 | sp y                                                                                                  |      |
| PfmaH [P. fici W106-1]    | SSMEFAGSPSG.VSPFGDLSTSNSEPPSSSSGSHTRATSCASHCLYDCSGEFDVTSNSAKGLPIS...TDS.DVILTDAANWFAHCTPFIYSGACFR     | 363  |
| Cmrl [P. vexata]          | GRADVLPITITDLSQMSNSE...HMSSSRGSHTRSTIMSS....GDFETITKTIVEMAASSPSE..VPEFEVVIADDAANWFAHCTPFIYSGACFR      | 337  |
| Cmrl [C. incanum]         | SRPLMSMSPFELSDMSSSASEPMTASSRSGSHTRSTIMST....ADFDTIMKPIEPALGMLSESTIAAEFEVVIADDSWHFAHCTPFIYSGACFR       | 432  |
| Pmrl [P. microspora_NK17] | STMDFAASPPGDVSPFGDLASNSSEPPSSAWGSHTRATSVCTP...GGSSQNVYPAIARAGPLLS...TDNGALNTTDAANWFAHCTPFIYSGACFR     | 443  |
| Consensus                 | s s ss gs htr ts e wp arc pp sg cp                                                                    |      |
| PfmaH [P. fici W106-1]    | TALGHLORECKSSVQCARPFAHTLERELSLNKNADLASVVMNSCIRDSLMSTSRFHARALDTHRENDPGRDRSPGLSNCGEMSFNLESSEKYLE        | 463  |
| Cmrl [P. vexata]          | TAIVHELESLECKSPHEGT...TDALEKYLECVDWDADLASVVMDSRIRDKMLATITGLHFALETHRGVNS.NENGRYSAGALITFIWLEPHKILE      | 432  |
| Cmrl [C. incanum]         | TAIVHELECKERSREDGT...WSSLEKYLENVDDITDASVIEHTSRIRDKMLATITGLHFALETHRGVNSNGYATPSEFNFIWLEPHKILE           | 527  |
| Pmrl [P. microspora_NK17] | TALGHLORECKSSVLTGTSASTLEHILSSVNLDADLASVVMHQCIRDLVCSISFHKHATIEVGGEDRGDIP...GKWGEMSYLNEFSSEKYLE         | 540  |
| Consensus                 | ta hl l ks g w le l d d v p trd i q f a h p k le                                                      |      |
| PfmaH [P. fici W106-1]    | FMKSYVRSITSEYSLVSEGRITPNOMHNDPEASITLMLLIAAGGASAVISEDARTISGLIETCRISLIDIDRNVMASADPDALEAALLFAHLCAGWSG    | 563  |
| Cmrl [P. vexata]          | YFLRSYVRSISFEYSLVSTGCVIPNEMIQNNCASTILVLLMIAAGGASAVITABARPLIARGIETCRISLIDIDHERDIEMCADPDALECALLSTLCAWSG | 532  |
| Cmrl [C. incanum]         | YFLRSYVRSITQYVYELIVAGCVIPNMLLNCASTILVLLMIAAGGASAVEMAPARPLIARGIETCRISLIDIDHEKVELSADPDALECALLSTLCAWSG   | 627  |
| Pmrl [P. microspora_NK17] | YMKTYVRSITSEYSLVSGITIPNPMHNDPEASITLMLLIAAGGASAVISEDARTISGLIETCRISLIDIDRNVMASADPDALEAALLFAHLCAGWSG     | 640  |
| Consensus                 | f yvrs l y l g cpn m n as l llm iaggasav ar l gl e cris l d i k e adp alr allf gawsg                  |      |
| PfmaH [P. fici W106-1]    | DKWLMDIAMGQGRGYISMLRHACMLIAQFPICEVLIDGQCGKNS.WRWLWQVETENRLVYDVMVMDQELSLFHDTPEGLDVSEIRALFCSSEKLESTV    | 662  |
| Cmrl [P. vexata]          | DKWLMDIAMGQGRGYISMLRHACMLIESQSMIPFQGSTIELQ.WRWLWQVETENRLVYDVMVMDQELSLFHDTPEGLDVSEIRALFCSSEKLESTV      | 631  |
| Cmrl [C. incanum]         | DKWLMDIAMGQGRGYISMLRHACMLIEFQSMIPTLNSTSTIELQ.WRWLWQVETENRLVYDVMVMDQELSLFHDTPEGLDVSEIRALFCSSEKLESTV    | 726  |
| Pmrl [P. microspora_NK17] | DKWLMDIAMGQGRGYISMLRHACMLIAQQAISAPFEDLQCGKNSRWLWQVETENRLVYDVMVMDQELSLFHDTPEGLDVSEIRALFCSSEKLESTV      | 740  |
| Consensus                 | dkwlndiamgqgrgny sm l haqml qp wr wl e nrlvy vm dqelslfhdt p l l lp e lw                              |      |
| PfmaH [P. fici W106-1]    | ECWAIACCYLSEKN.....EHPITPSTNHHYRREFTECDVVGDRVGITAEQLRLLIHFCCKMLCCRCRITCFSEHMFVEDQPGHVSFSKAYVMRQVE     | 755  |
| Cmrl [P. vexata]          | ECWAGMCSYIGGTANVNAQLLITELTSPSLIDIFQFELHINDSRQSSITPQQLRLLIHFCCKMLCCRCRITCFSEHMFVEDQPGHVSFSKAYVMRQVE    | 731  |
| Cmrl [C. incanum]         | ECWFANVCSYIGGTANVNPQLLESBLTSPSLIDIFQFELHINDSRQSSITPQQLRLLIHFCCKMLCCRCRITCFSEHMFVEDQPGHVSFSKAYVMRQVE   | 826  |
| Pmrl [P. microspora_NK17] | ECWAIACCYLSEKN.....EHPITPSTNHHYRREFTECDVVGDRVGITAEQLRLLIHFCCKMLCCRCRITCFSEHMFVEDQPGHVSFSKAYVMRQVE     | 833  |
| Consensus                 | eqw p ps l fl l l qlrlllhp q lc rq l cfsd m e                                                         |      |
| PfmaH [P. fici W106-1]    | VYRSILSRWHITAMRCLNMNPICTIMRTNMVYHLISLNAVTFPEIEPFAFCERYIGSYWG...SRHCRCYVPOCAVHDCGOVESILRNLETDREHWW     | 853  |
| Cmrl [P. vexata]          | BVCAILQKAYETISITYHKTNPENQPVSKNTNVIYHLISLNAVTFPEIEPFAFCERYIGSYWG...SRHCRCYVPOCAVHDCGOVESILRNLETDREHWW  | 831  |
| Cmrl [C. incanum]         | BVCAILQKAYETISITYHKTNPENQPVSKNTNVIYHLISLNAVTFPEIEPFAFCERYIGSYWG...SRHCRCYVPOCAVHDCGOVESILRNLETDREHWW  | 926  |
| Pmrl [P. microspora_NK17] | VYRSILSRWHITAMRCLNMNPICTIMRTNMVYHLISLNAVTFPEIEPFAFCERYIGSYWG...SRHCRCYVPOCAVHDCGOVESILRNLETDREHWW     | 933  |
| Consensus                 | v ll w l n c n vlyhlislnavt fpeie ar gs w rc y r a qv p dr p ww                                       |      |
| PfmaH [P. fici W106-1]    | SAATYRATILWATISALCSQQAHA.....SLSPPEATEGQYAMNAQLFNHILDY.NVIEYVTRSIGTPF                                 | 918  |
| Cmrl [P. vexata]          | SVATYRATILWATISVSRLDENFQK.....HDSGNEVAIDQVTPEDBAIAYLWNG.IGIEVITRIGITA                                 | 896  |
| Cmrl [C. incanum]         | PAGYRATILWATISVARLDPNFQKAQAQQTSSPASQHPSSSPEHLSGAGASNAATSGCHSGNIVAIQVTPEDBAIAYLWNG.IGIEVITRIGITA       | 1026 |
| Pmrl [P. microspora_NK17] | TAATYRATILWATISLLHSQT.....SLSPAEASILSHTAHSGGLEMAPDY.NGMFYETRIGITA                                     | 994  |
| Consensus                 | y rat ilw ds s p t d t                                                                                |      |
| PfmaH [P. fici W106-1]    | HLDRHSEVLVYAIQPIDCGASSHIGEGIRKILIRLNWH.....                                                           | 958  |
| Cmrl [P. vexata]          | NIEKENVLSYAAKPIEBGISSRLNIGIRRRIVLGNWNVVDGTVMTTA                                                       | 945  |
| Cmrl [C. incanum]         | GIEKEAEVISYIMTIEBGITCHIGEGIRKILIRLNWNVVDGLAATT                                                        | 1075 |
| Pmrl [P. microspora_NK17] | HLDRHSEVLVYAIQPIDCGASSHIGEGIRKILIRLNWH.....                                                           | 1034 |
| Consensus                 | l v y i g r gl rk l nw                                                                                |      |

**Figure S2.** Amino-acid sequence (complete sequence) alignments of Pmr1 homologs from *Pestalotiopsis fici* W106-1, *Pseudomassariella vexata* and *Colletotrichum incanum*. Numbers indicated the length and the overall percentage of amino acid sequence identity was shown on the top. The identical amino acids were highlighted in blue.

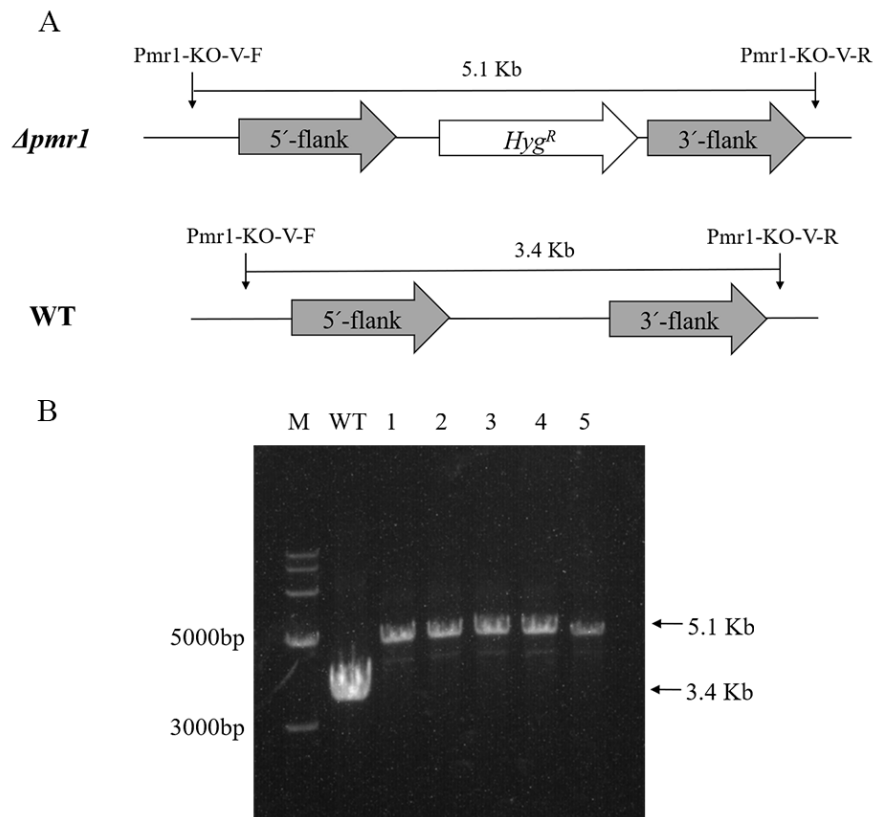

**Figure S3.** Diagnostic PCR screening for *pmr1* deletion mutants. **(A)** Schematic illustration of diagnostic PCR of *Δpmr1*. Primers pairs Pmr1-KO-V-F/Pmr1-KO-V-R were used for transformant screening. **(B)** Confirmation of *Δpmr1* strains by diagnostic PCR. A 5.1 Kb fragment could be amplified by the primers pair in mutants, while a 3.4 Kb fragment could be amplified in WT.

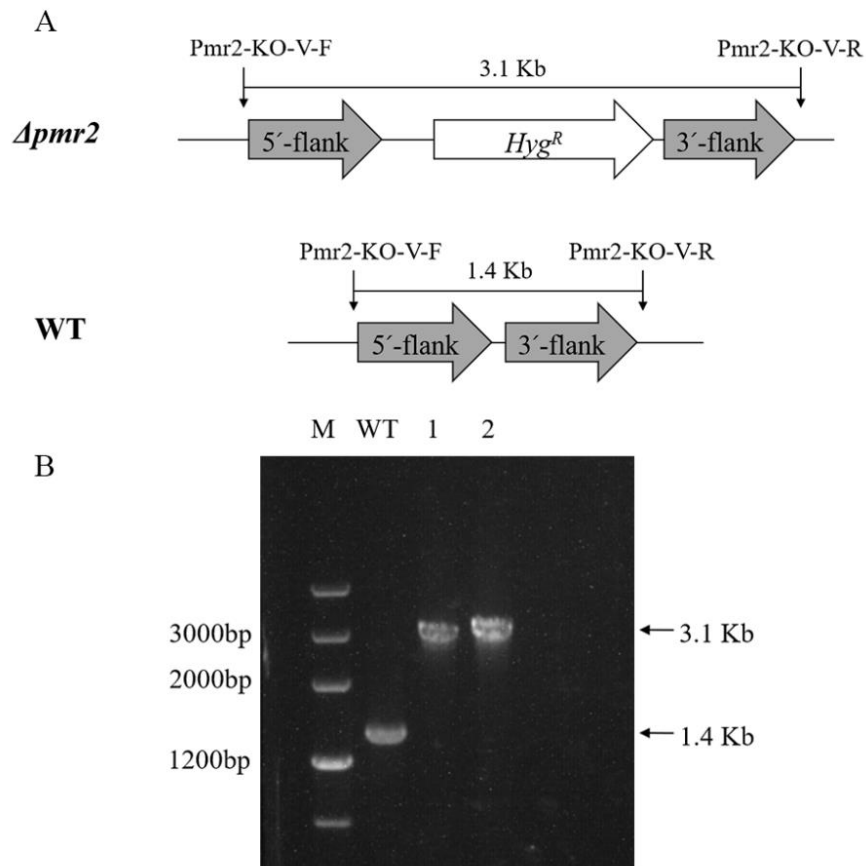

**Figure S4.** Diagnostic PCR screening for *pmr2* deletion mutants. **(A)** Schematic illustration of diagnostic PCR of *Δpmr2*. Primers pairs Pmr2-KO-V-F/ Pmr2-KO-V-R were used for transformant screening. **(B)** Confirmation of *Δpmr2* strains by diagnostic PCR. A 3.1 Kb band was amplified by the verify primers pair in *Δpmr2* mutants, while a 1.4 Kb band was amplified in WT. M: Marker III DNA Marker.
